# Supplementary material for: The Permafrost and Organic LayEr module for Forest Models (POLE-FM) 1.0
Source: Copernicus journal article supplement (doi:10.5194/gmd-16-2011-2023), 2023-04-13
Supplement: Supplementary file 1 [file gmd-16-2011-2023-supplement.zip]

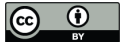

*Supplement of*

## **The Permafrost and Organic LayEr module for Forest Models (POLE-FM) 1.0**

**Winslow D. Hansen et al.**

*Correspondence to:* Winslow D. Hansen ([hansenw@caryinstitute.org](mailto:hansenw@caryinstitute.org))

- [gmd-16-2011-2023-supplement-title-page.pdf](#)
- POLE-FM1.0code
  - POLE-FM1.0.cpp
  - POLE-FM1.0.h
  - related
    - \* [watercycle.cpp](#)
    - \* [watercycle.h](#)

The copyright of individual parts of the supplement might differ from the article licence.
